# Supplementary material for: Interactive sonification of a fluid dance movement: an exploratory study
Source: Springer Nature journal article supplement (doi:10.1007/s12193-018-0278-y), 2018-11-15
Supplement: MOESM1 [file 16274478]

Slider1	Slider2	Slider3	Slider4	Slider5	Slider6	Condition	PublishedSubjectNumber
127	13	29	0	30	10	Fluid	1
127	25	0	35	113	113	Fluid	2
0	10	0	47	22	34	Fluid	3
0	0	66	11	0	40	Fluid	4
0	86	76	28	28	64	Fluid	5
0	50	48	104	99	93	Fluid	6
28	25	30	19	30	62	Fluid	8
0	23	65	20	38	44	Fluid	9
124	31	73	16	0	35	Fluid	10
0	19	0	49	9	0	Fluid	11
16	34	40	34	61	127	Fluid	12
36	10	69	54	56	44	Fluid	14
0	17	59	53	21	0	Fluid	16
100	54	44	0	58	0	Fluid	17
0	38	56	32	63	32	Fluid	18
43	28	74	0	0	1	Fluid	19
89	26	31	3	26	35	Fluid	25
64	35	13	0	1	79	Fluid	29
1	127	71	127	0	47	Nonfluid	1
127	21	0	92	127	127	Nonfluid	2
127	83	119	93	88	127	Nonfluid	3
0	54	127	0	0	0	Nonfluid	4
0	127	81	117	0	92	Nonfluid	5
0	22	127	0	0	0	Nonfluid	6
49	81	58	91	102	91	Nonfluid	8
115	104	0	102	0	46	Nonfluid	9
127	121	0	98	1	127	Nonfluid	10
0	20	0	49	9	0	Nonfluid	11
127	127	127	127	127	127	Nonfluid	12
0	127	127	0	102	0	Nonfluid	14
0	50	94	114	127	0	Nonfluid	16
54	56	0	116	127	127	Nonfluid	17
0	100	127	61	0	71	Nonfluid	18
0	124	111	50	0	1	Nonfluid	19
126	104	107	107	110	113	Nonfluid	25
0	127	124	0	127	127	Nonfluid	29
